# Supplementary material for: Enzymatic Hydrolysis Modifies Emulsifying Properties of Okra Pectin
Source: MDPI journal article supplement (doi:10.3390/foods11101497), 2022-05-20
Supplement: s1 [file s1]

**Supplementary file: Enzymatic hydrolysis modifies emulsifying properties of okra pectin**

**Table S1.** Flow behavior index ( $n$ ), consistency index ( $\kappa$ ), and apparent viscosity ( $\eta_{ap}$ ) of pectin solutions and their corresponding oil-in-water emulsions.

| Model parameters | Pectin solutions |       |       |                               | Emulsions |       |       |                                |
|------------------|------------------|-------|-------|-------------------------------|-----------|-------|-------|--------------------------------|
|                  | $K$              | $n$   | $r^2$ | $^1\eta_{ap}$                 | $K$       | $n$   | $r^2$ | $^1\eta_{ap}$                  |
| CON              | 8.928            | 0.488 | 0.998 | 59.85 $\pm$ 0.16 <sup>a</sup> | 16.976    | 0.479 | 0.995 | 111.30 $\pm$ 0.32 <sup>a</sup> |
| PG               | 7.656            | 0.440 | 0.995 | 38.58 $\pm$ 0.23 <sup>c</sup> | 16.573    | 0.411 | 0.996 | 75.35 $\pm$ 0.26 <sup>b</sup>  |
| PG+GL+AR         | 2.843            | 0.535 | 0.996 | 24.08 $\pm$ 0.26 <sup>d</sup> | 14.047    | 0.347 | 0.993 | 44.63 $\pm$ 0.59 <sup>d</sup>  |
| GL               | 8.249            | 0.437 | 0.994 | 42.50 $\pm$ 0.71 <sup>b</sup> | 18.191    | 0.318 | 0.990 | 55.88 $\pm$ 0.25 <sup>c</sup>  |
| GL+AR            | 2.263            | 0.559 | 0.995 | 21.70 $\pm$ 0.22 <sup>e</sup> | 6.902     | 0.420 | 0.995 | 31.90 $\pm$ 0.65 <sup>e</sup>  |

<sup>1</sup> $\eta_{ap}$  recorded at a shear rate of 192 s<sup>-1</sup> (50 rpm). Data presented as mean  $\pm$  standard deviation ( $n = 3$ ), and letters (a-e) represent significant differences between samples ( $p < 0.05$ ).
